# Supplementary material
Source: MDPI journal article supplement (https://www.mdpi.com/2036-7422/14/2/16)
Supplement: s1 [file s1 › gastroent-2263061-supplementary.pdf]

# SUPPLEMENTARY FIGURES

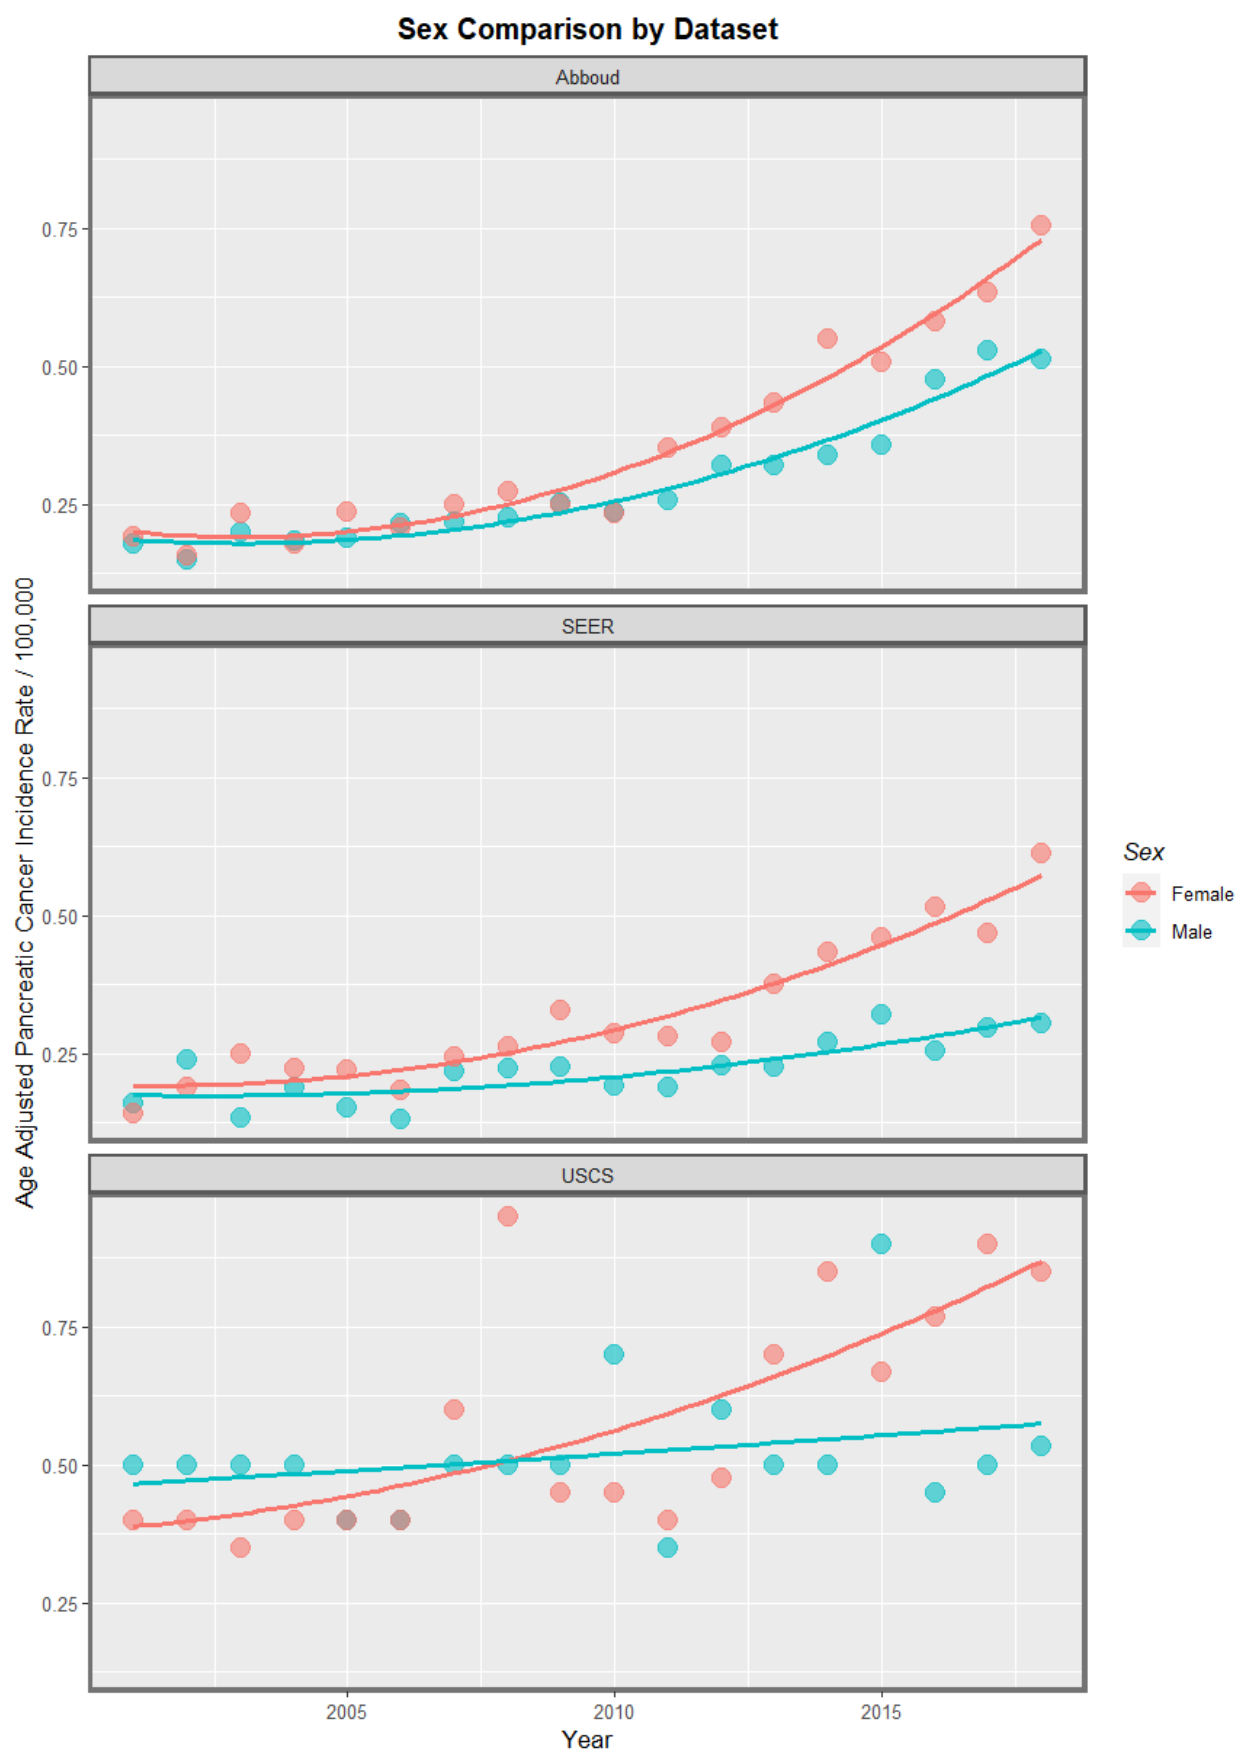

Supplementary Figure S1. Sex Differences in pancreatic cancer incidence 15-34 years by Sex by dataset.

Correlogram - PDAC & Substances

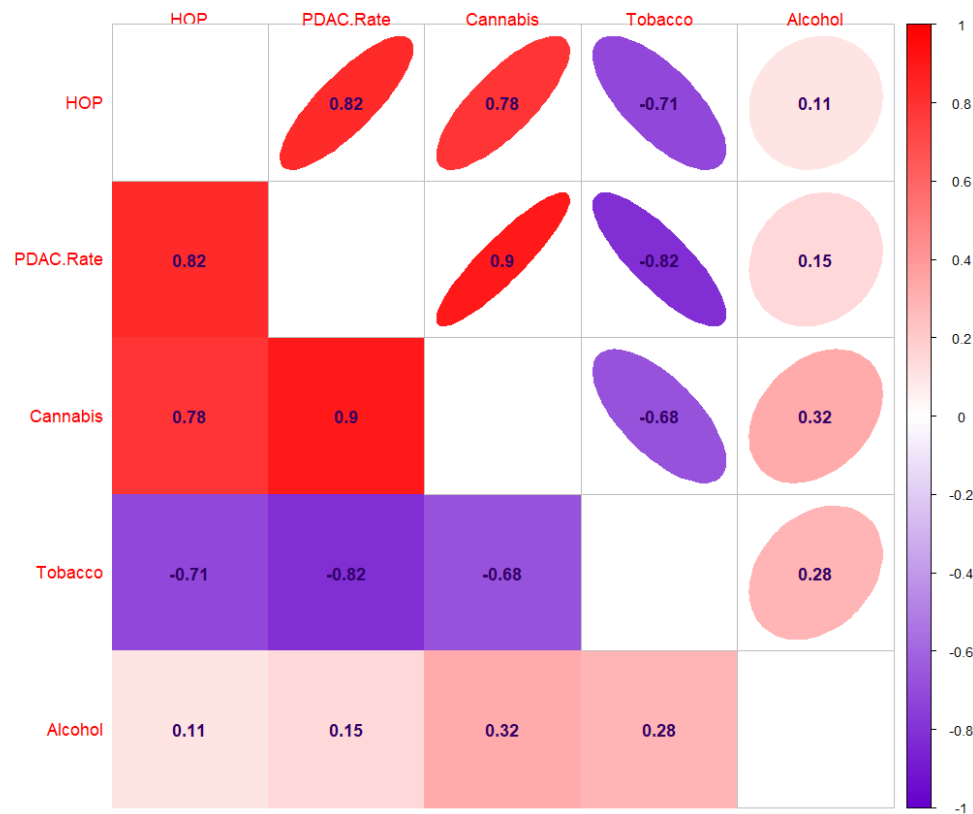

Significance - PDAC & Substances

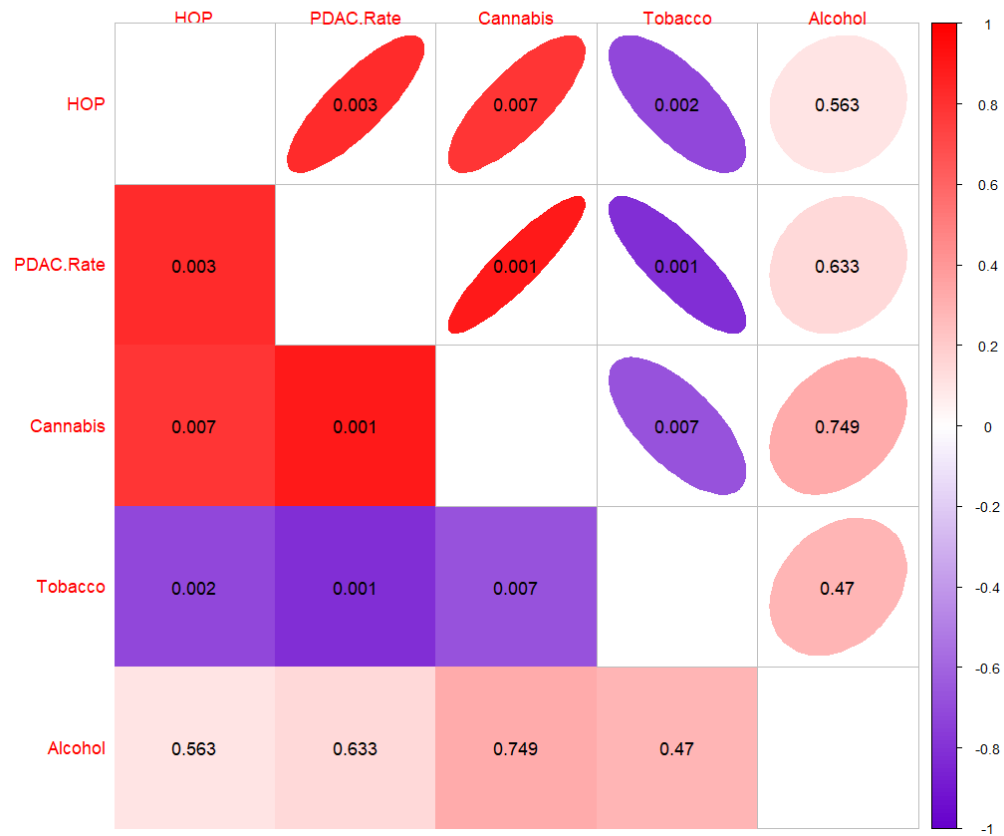

Supplementary Figure S2. Correlograms for Hispanic American Males 15-34 years of age (A) Pearson Correlation Matrix and (B) Significance level of those correlations.

**Correlogram - PDAC & Substances**

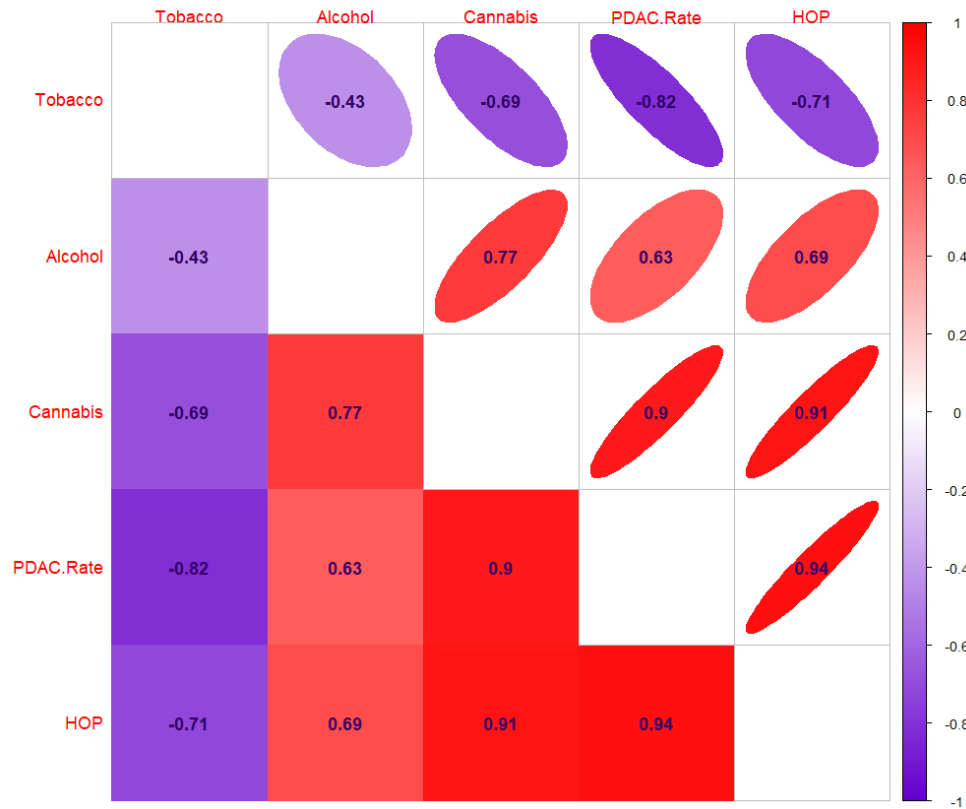

**Significance - PDAC & Substances**

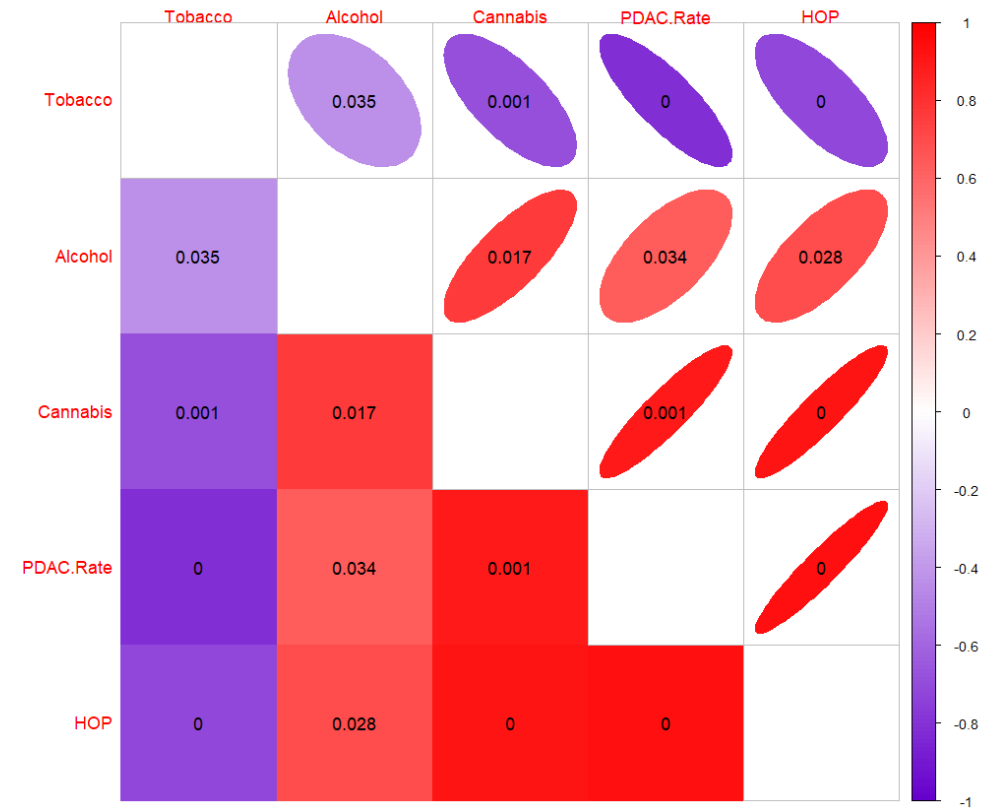

Supplementary Figure S3. Correlograms for Hispanic American Males 15-34 years of age (A) Pearson Correlation Matrix and (B) Significance level of those correlations.
